# Supplementary material for: Tyrosine Hydroxylase is crucial for maintaining pupal tanning and immunity in Anopheles sinensis
Source: Springer Nature journal article supplement (doi:10.1038/srep29835), 2016-07-15
Supplement: 41598_2016_BFsrep29835_MOESM1_ESM.pdf [file 41598_2016_BFsrep29835_MOESM1_ESM.pdf]

## Supplementary information

### Tyrosine Hydroxylase is crucial for maintaining the pupae tanning and immune in *Anopheles sinensis*

Liang Qiao<sup>1+\*</sup>, Minghui Du<sup>1+</sup>, Xin Liang<sup>1</sup>, Youjin Hao<sup>1</sup>, Xiu He<sup>1</sup>, Fengling Si<sup>1</sup>, Ting Mei<sup>1</sup>, Bin Chen<sup>1\*</sup>

<sup>1</sup>Institute of Entomology and Molecular Biology, College of Life Sciences, Chongqing Normal University, Chongqing, 400716, China.

\*To whom correspondence should be addressed: Liang Qiao, Institute of Entomology and Molecular Biology, College of Life Sciences, Chongqing Normal University, Chongqing, 401331, China, Tel: +86-23-65910315, Fax: +86-23-65910315, E-mail address: qiaoliangswu@163.com, or Bin Chen, Institute of Entomology and Molecular Biology, College of Life Sciences, Chongqing Normal University, Chongqing, 401331, China, e-mail address: bin.chen@cqnu.edu.cn.

<sup>+</sup>Liang Qiao and Minghui Du contributed equally to this work.

Running title: *AsTH* for *Anopheles sinensis* pupae development

#### 6 Supplemental Figures

#### 3 Supplemental Tables

#### Supplementary Figure legends

**Figure S1.** Alignment analysis of TH amino acid sequences among different insect species. Horizontal line indicates the Bioperin-H domain.

**Figure S2.** Detection of RNAi off-target effects. a. The pupa cuticle pigmentation pattern at 38<sup>th</sup> hour of pupation between *dsTH2* and *dsRed* group. Scale bar=500 $\mu$ m. b. The expression level of *AsTH* between *dsTH2* and *dsRed* individuals at 38<sup>th</sup> hour of pupation. *RPL49* was used as the internal control.

**Figure S3.** Precise region of cuticle frozen section. The red box region represents the observed sliced section region. Scale bar=100 $\mu$ m.

**Figure S4.** The expression pattern of *AsTH* gene expression in the egg (eggs were gathered from 1 hour to 1 day after born) stage, larval stage and adult stage, respectively. *RPL49* was used as the internal control.

**Figure S5.** Spatial expression pattern of *AsTH* in different tissues at 38<sup>th</sup> hour of pupation. IN represents the integument, FB represents the fat body, (HE+G) represents the mixture of the hemolymph and the gut. The "\*" symbol represents treatment with bacteria. *RPL49* was used as the internal control.

**Figure S6.** The expression levels of 4 representative *Anopheles sinensis* pro-phenoloxidase (PPO) genes (The orthologous genes in *Anopheles gambiae* were expressed in the immune tissues) between *dsTH* and *dsRed* group at 38<sup>th</sup> hour of pupation. *RPL49* was used as the internal control.

# Figure S1

*An. gambiae* : MAVAAQAQKREMFIAKKSYS **EN**GYPSRRRSLVDDARFETIVVKTKQCTVLEARAKANEDEKTPQEVQQTVEDQNDDEEIRMVAVDELQPKQPEHVPFA  
*An. coluzzii* : MAVAAQAQKREMFIAKKSYS **EN**GYPSRRRSLVDDARFETIVVKTKQCTVLEARAKANEDEKTPQEVQQTVEDQNDDEEIRMVAVDELQPKQPEHVPFA  
*An. arabiensis* : MAVAAQAQKREMFIAKKSYS **EN**GYPSRRRSLVDDARFETIVVKTKQCTVLEARAKANEDEKTPQEVQQTVEDQNDDEEIRMVAVDELQPKQPEHVPFA  
*An. stephensi* : MAVAAQAQKREMFIAKKSYS **EN**GYPSRRRSLVDDARFETIVVKTKQCTVLEARAKANEDEKTPQEVQQTVEDQNDDEEIRMVAVDELQPKQPEHVPFA  
*An. dirus* : MAVAAQAQKREMFIAKKSYS **EN**GYPSRRRSLVDDARFETIVVKTKQCTVLEARAKANEDEKTPQEVQQTVEDQNDDEEIRMVAVDELQPKQPEHVPFA  
*An. funestus* : MAVAAQAQKREMFIAKKSYS **EN**GYPSRRRSLVDDARFETIVVKTKQCTVLEARAKANEDEKTPQEVQQTVEDQNDDEEIRMVAVDELQPKQPEHVPFA  
*An. sinensis* : MAVAAQAQKREMFIAKKSYS **EN**GYPSRRRSLVDDARFETIVVKTKQCTVLEARAKANEDEKTPQEVQQTVEDQNDDEEIRMVAVDELQPKQPEHVPFA  
*Cx. quinquefasciatus* : **M**LAAAQKREMFIAKKSYS **EN**GYPSRRRSLVDDARFETIVVKTKQCTVLEARAKANEDEKTPQEVQQTVEDQNDDEEIRMVAVDELQPKQPEHVPFA  
*Ae. aegypti* : -----**M**EAIVEEQO-----  
*Dr. melanogaster* : MAVAAQAQKREMFIAKKSYS **EN**GYPSRRRSLVDDARFETIVVKTKQCTVLEARAKANEDEKTPQEVQQTVEDQNDDEEIRMVAVDELQPKQPEHVPFA  
*Ma. sexta* : MAVAAQAQKREMFIAKKSYS **EN**GYPSRRRSLVDDARFETIVVKTKQCTVLEARAKANEDEKTPQEVQQTVEDQNDDEEIRMVAVDELQPKQPEHVPFA  
*Bm. mori* : MAVAAQAQKREMFIAKKSYS **EN**GYPSRRRSLVDDARFETIVVKTKQCTVLEARAKANEDEKTPQEVQQTVEDQNDDEEIRMVAVDELQPKQPEHVPFA  
*Da. plexippus* : MAVAAQAQKREMFIAKKSYS **EN**GYPSRRRSLVDDARFETIVVKTKQCTVLEARAKANEDEKTPQEVQQTVEDQNDDEEIRMVAVDELQPKQPEHVPFA  
*Tr. castaneum* : AAVAAQAQKREMFIAKKSYS **EN**GYPSRRRSLVDDARFETIVVKTKQCTVLEARAKANEDEKTPQEVQQTVEDQNDDEEIRMVAVDELQPKQPEHVPFA  
 a aaqknremfa kksys ElgypSrrrrslvddarfet vvkqtkq vl ear an

*An. gambiae* : DDEDKETDAGLTFE **EV**VLV **NA**AS **SP**PAE **K**EWRAAVV **V**LR **GM**SLGRILKAWAYE **ST**V **H**LESRSRSEGVQFDVILVKYDVA **BA**NLLQLIRSLRQI  
*An. coluzzii* : DDEDKETDAGLTFE **EV**VLV **NA**AS **SP**PAE **K**EWRAAVV **V**LR **GM**SLGRILKAWAYE **ST**V **H**LESRSRSEGVQFDVILVKYDVA **BA**NLLQLIRSLRQI  
*An. arabiensis* : DDEDKETDAGLTFE **EV**VLV **NA**AS **SP**PAE **K**EWRAAVV **V**LR **GM**SLGRILKAWAYE **ST**V **H**LESRSRSEGVQFDVILVKYDVA **BA**NLLQLIRSLRQI  
*An. stephensi* : DDEDKETDAGLTFE **EV**VLV **NA**AS **SP**PAE **K**EWRAAVV **V**LR **GM**SLGRILKAWAYE **ST**V **H**LESRSRSEGVQFDVILVKYDVA **BA**NLLQLIRSLRQI  
*An. dirus* : DDEDKETDAGLTFE **EV**VLV **NA**AS **SP**PAE **K**EWRAAVV **V**LR **GM**SLGRILKAWAYE **ST**V **H**LESRSRSEGVQFDVILVKYDVA **BA**NLLQLIRSLRQI  
*An. funestus* : DDEDKETDAGLTFE **EV**VLV **NA**AS **SP**PAE **K**EWRAAVV **V**LR **GM**SLGRILKAWAYE **ST**V **H**LESRSRSEGVQFDVILVKYDVA **BA**NLLQLIRSLRQI  
*An. sinensis* : DDEDKETDAGLTFE **EV**VLV **NA**AS **SP**PAE **K**EWRAAVV **V**LR **GM**SLGRILKAWAYE **ST**V **H**LESRSRSEGVQFDVILVKYDVA **BA**NLLQLIRSLRQI  
*Cx. quinquefasciatus* : AODD-ETTAGLTFE **EV**VLV **NA**AS **SP**PAE **K**EWRAAVV **V**LR **GM**SLGRILKAWAYE **ST**V **H**LESRSRSEGVQFDVILVKYDVA **BA**NLLQLIRSLRQI  
*Ae. aegypti* : **D**EID-**AG**LTFE **EV**VLV **NA**AS **SP**PAE **K**OWRAAVV **V**LR **GM**SLGRILKAWAYE **ST**V **H**LESRSRSEGVQFDVILVKYDVA **BA**NLLQLIRSLRQI  
*Dr. melanogaster* : -----**Y**GLTFE **D**ITL **NA**AS **SP**PAE **A**QAQAAAL **L**MR **GM**SLGRILKAWAYE **ST**V **H**LESRSRSEGVQFDVILVKYDVA **BA**NLLQLIRSLRQI  
*Ma. sexta* : DDNKADPDTYTFE **EV**VLV **NA**AS **SP**PAE **A**QAQAAAL **L**MR **GM**SLGRILKAWAYE **ST**V **H**LESRSRSEGVQFDVILVKYDVA **BA**NLLQLIRSLRQI  
*Bm. mori* : DDDADPDTYTFE **EV**VLV **NA**AS **SP**PAE **A**QAQAAAL **L**MR **GM**SLGRILKAWAYE **ST**V **H**LESRSRSEGVQFDVILVKYDVA **BA**NLLQLIRSLRQI  
*Da. plexippus* : NETGTDPDTYTFE **EV**VLV **NA**AS **SP**PAE **A**QAQAAAL **L**MR **GM**SLGRILKAWAYE **ST**V **H**LESRSRSEGVQFDVILVKYDVA **BA**NLLQLIRSLRQI  
*Tr. castaneum* : **D**-----**S**GLTFE **EV**VLV **NA**AS **SP**PAE **A**QAQAAAL **L**MR **GM**SLGRILKAWAYE **ST**V **H**LESRSRSEGVQFDVILVKYDVA **BA**NLLQLIRSLRQI  
 D gLTlEe66LqNaaS EspeAE 6 AA666r64dG6gSL R6Lk 6e G 6 H6E3R s gvqfD L6K6 M R nl6QLI4sLRQ3

*An. gambiae* : QSFQSVSLSENNVNYKAWPFF **H**AS **L**DCNHLMTKYE **P**DLDMNHGPFAD **Q**VYR **R**RRKEIA **IA**FAFYRGDP **Y** **I**Y **D**Y **T**ENK **WA**AVE **G**VKEL **M**VQ  
*An. coluzzii* : QSFQSVSLSENNVNYKAWPFF **H**AS **L**DCNHLMTKYE **P**DLDMNHGPFAD **Q**VYR **R**RRKEIA **IA**FAFYRGDP **Y** **I**Y **D**Y **T**ENK **WA**AVE **G**VKEL **M**VQ  
*An. arabiensis* : QSFQSVSLSENNVNYKAWPFF **H**AS **L**DCNHLMTKYE **P**DLDMNHGPFAD **Q**VYR **R**RRKEIA **IA**FAFYRGDP **Y** **I**Y **D**Y **T**ENK **WA**AVE **G**VKEL **M**VQ  
*An. stephensi* : QSFQSVSLSENNVNYKAWPFF **H**AS **L**DCNHLMTKYE **P**DLDMNHGPFAD **Q**VYR **R**RRKEIA **IA**FAFYRGDP **Y** **I**Y **D**Y **T**ENK **WA**AVE **G**VKEL **M**VQ  
*An. dirus* : QSFQSVSLSENNVNYKAWPFF **H**AS **L**DCNHLMTKYE **P**DLDMNHGPFAD **Q**VYR **R**RRKEIA **IA**FAFYRGDP **Y** **I**Y **D**Y **T**ENK **WA**AVE **G**VKEL **M**VQ  
*An. funestus* : QSFQSVSLSENNVNYKAWPFF **H**AS **L**DCNHLMTKYE **P**DLDMNHGPFAD **Q**VYR **R**RRKEIA **IA**FAFYRGDP **Y** **I**Y **D**Y **T**ENK **WA**AVE **G**VKEL **M**VQ  
*An. sinensis* : QSFQSVSLSENNVNYKAWPFF **H**AS **L**DCNHLMTKYE **P**DLDMNHGPFAD **Q**VYR **R**RRKEIA **IA**FAFYRGDP **Y** **I**Y **D**Y **T**ENK **WA**AVE **G**VKEL **M**VQ  
*Cx. quinquefasciatus* : AFSQSVSLSENNVNYKAWPFF **H**AS **L**DCNHLMTKYE **P**DLDMNHGPFAD **Q**VYR **R**RRKEIA **IA**FAFYRGDP **Y** **I**Y **D**Y **T**ENK **WA**AVE **G**VKEL **M**VQ  
*Ae. aegypti* : AFSQSVSLSENNVNYKAWPFF **H**AS **L**DCNHLMTKYE **P**DLDMNHGPFAD **Q**VYR **R**RRKEIA **IA**FAFYRGDP **Y** **I**Y **D**Y **T**ENK **WA**AVE **G**VKEL **M**VQ  
*Dr. melanogaster* : GFSFNNMADNNVNYKAWPFF **H**AS **L**DCNHLMTKYE **P**DLDMNHGPFAD **Q**VYR **R**RRKEIA **IA**FAFYRGDP **Y** **I**Y **D**Y **T**ENK **WA**AVE **G**VKEL **M**VQ  
*Ma. sexta* : TAFAGVNNHSDNNISSTKWPFF **H**AS **L**DCNHLMTKYE **P**DLDMNHGPFAD **Q**VYR **R**RRKEIA **IA**FAFYRGDP **Y** **I**Y **D**Y **T**ENK **WA**AVE **G**VKEL **M**VQ  
*Bm. mori* : TAFAGVNNHSDNNISSTKWPFF **H**AS **L**DCNHLMTKYE **P**DLDMNHGPFAD **Q**VYR **R**RRKEIA **IA**FAFYRGDP **Y** **I**Y **D**Y **T**ENK **WA**AVE **G**VKEL **M**VQ  
*Da. plexippus* : TAFAGVNNHSDNNISSTKWPFF **H**AS **L**DCNHLMTKYE **P**DLDMNHGPFAD **Q**VYR **R**RRKEIA **IA**FAFYRGDP **Y** **I**Y **D**Y **T**ENK **WA**AVE **G**VKEL **M**VQ  
*Tr. castaneum* : SLELHCITGELNISA **K**AWPFF **H**AS **L**DCNHLMTKYE **P**DLDMNHGPFAD **Q**VYR **R**RRKEIA **IA**FAFYRGDP **Y** **I**Y **D**Y **T**ENK **WA**AVE **G**VKEL **M**VQ  
 sf 66 e N6 K WFPF HAS LDCNHLMTK5EPdLDMNHGPFAD YR RRRK2IAe6AFaY4YGPdIP I Y3e En TW VF V Lm k

*An. gambiae* : HACSPYLAVR **R**KLDEK **I**VKER **P**OLQMS **D**L **R**KN **P**GET **L**RPAAGLL **T**ARDF **L**AS **L**AF **R**FOSTOYVRH **I**NSPYHTPEPD **I**HELLGHMPL **L**ADP **S**FA  
*An. coluzzii* : HACSPYLAVR **R**KLDEK **I**VKER **P**OLQMS **D**L **R**KN **P**GET **L**RPAAGLL **T**ARDF **L**AS **L**AF **R**FOSTOYVRH **I**NSPYHTPEPD **I**HELLGHMPL **L**ADP **S**FA  
*An. arabiensis* : HACSPYLAVR **R**KLDEK **I**VKER **P**OLQMS **D**L **R**KN **P**GET **L**RPAAGLL **T**ARDF **L**AS **L**AF **R**FOSTOYVRH **I**NSPYHTPEPD **I**HELLGHMPL **L**ADP **S**FA  
*An. stephensi* : HACSPYLAVR **R**KLDEK **I**VKER **P**OLQMS **D**L **R**KN **P**GET **L**RPAAGLL **T**ARDF **L**AS **L**AF **R**FOSTOYVRH **I**NSPYHTPEPD **I**HELLGHMPL **L**ADP **S**FA  
*An. dirus* : HACSPYLAVR **R**KLDEK **I**VKER **P**OLQMS **D**L **R**KN **P**GET **L**RPAAGLL **T**ARDF **L**AS **L**AF **R**FOSTOYVRH **I**NSPYHTPEPD **I**HELLGHMPL **L**ADP **S**FA  
*An. funestus* : HACSPYLAVR **R**KLDEK **I**VKER **P**OLQMS **D**L **R**KN **P**GET **L**RPAAGLL **T**ARDF **L**AS **L**AF **R**FOSTOYVRH **I**NSPYHTPEPD **I**HELLGHMPL **L**ADP **S**FA  
*An. sinensis* : HACSPYLAVR **R**KLDEK **I**VKER **P**OLQMS **D**L **R**KN **P**GET **L**RPAAGLL **T**ARDF **L**AS **L**AF **R**FOSTOYVRH **I**NSPYHTPEPD **I**HELLGHMPL **L**ADP **S**FA  
*Cx. quinquefasciatus* : HACSPYLAVR **R**KLDEK **I**VKER **P**OLQMS **D**L **R**KN **P**GET **L**RPAAGLL **T**ARDF **L**AS **L**AF **R**FOSTOYVRH **I**NSPYHTPEPD **I**HELLGHMPL **L**ADP **S**FA  
*Ae. aegypti* : HACSPYLAVR **R**KLDEK **I**VKER **P**OLQMS **D**L **R**KN **P**GET **L**RPAAGLL **T**ARDF **L**AS **L**AF **R**FOSTOYVRH **I**NSPYHTPEPD **I**HELLGHMPL **L**ADP **S**FA  
*Dr. melanogaster* : HACSPYLAVR **R**KLDEK **I**VKER **P**OLQMS **D**L **R**KN **P**GET **L**RPAAGLL **T**ARDF **L**AS **L**AF **R**FOSTOYVRH **I**NSPYHTPEPD **I**HELLGHMPL **L**ADP **S**FA  
*Ma. sexta* : HACSPYLAVR **R**KLDEK **I**VKER **P**OLQMS **D**L **R**KN **P**GET **L**RPAAGLL **T**ARDF **L**AS **L**AF **R**FOSTOYVRH **I**NSPYHTPEPD **I**HELLGHMPL **L**ADP **S**FA  
*Bm. mori* : HACSPYLAVR **R**KLDEK **I**VKER **P**OLQMS **D**L **R**KN **P**GET **L**RPAAGLL **T**ARDF **L**AS **L**AF **R**FOSTOYVRH **I**NSPYHTPEPD **I**HELLGHMPL **L**ADP **S**FA  
*Da. plexippus* : HACSPYLAVR **R**KLDEK **I**VKER **P**OLQMS **D**L **R**KN **P**GET **L**RPAAGLL **T**ARDF **L**AS **L**AF **R**FOSTOYVRH **I**NSPYHTPEPD **I**HELLGHMPL **L**ADP **S**FA  
*Tr. castaneum* : HACSPYLAVR **R**KLDEK **I**VKER **P**OLQMS **D**L **R**KN **P**GET **L**RPAAGLL **T**ARDF **L**AS **L**AF **R**FOSTOYVRH **I**NSPYHTPEPD **I**HELLGHMPL **L**ADP **S**FA  
 HAC BY a F kl2 e I fV R6PQLZ6eS FL44 TGF3LRPAAGLLTARDFLASLAFR6FQSTQYVRH N3P5HTPEPDcIHELLGH6PLLADP **S**FA

*An. gambiae* : QFSQIEGLASLGASD **E**IEKLS **T**VYWF **V**TEFGLCKE **D**EVKAY **G**AGLLSAY **G**ELLHA **I**SDK **D**RRR **F**EA **S**T **V**OPY **Q**DQY **Q**P **I**YVAES **F** **D**AK **K**FR  
*An. coluzzii* : QFSQIEGLASLGASD **E**IEKLS **T**VYWF **V**TEFGLCKE **D**EVKAY **G**AGLLSAY **G**ELLHA **I**SDK **D**RRR **F**EA **S**T **V**OPY **Q**DQY **Q**P **I**YVAES **F** **D**AK **K**FR  
*An. arabiensis* : QFSQIEGLASLGASD **E**IEKLS **T**VYWF **V**TEFGLCKE **D**EVKAY **G**AGLLSAY **G**ELLHA **I**SDK **D**RRR **F**EA **S**T **V**OPY **Q**DQY **Q**P **I**YVAES **F** **D**AK **K**FR  
*An. stephensi* : QFSQIEGLASLGASD **E**IEKLS **T**VYWF **V**TEFGLCKE **D**EVKAY **G**AGLLSAY **G**ELLHA **I**SDK **D**RRR **F**EA **S**T **V**OPY **Q**DQY **Q**P **I**YVAES **F** **D**AK **K**FR  
*An. dirus* : QFSQIEGLASLGASD **E**IEKLS **T**VYWF **V**TEFGLCKE **D**EVKAY **G**AGLLSAY **G**ELLHA **I**SDK **D**RRR **F**EA **S**T **V**OPY **Q**DQY **Q**P **I**YVAES **F** **D**AK **K**FR  
*An. funestus* : QFSQIEGLASLGASD **E**IEKLS **T**VYWF **V**TEFGLCKE **D**EVKAY **G**AGLLSAY **G**ELLHA **I**SDK **D**RRR **F**EA **S**T **V**OPY **Q**DQY **Q**P **I**YVAES **F** **D**AK **K**FR  
*An. sinensis* : QFSQIEGLASLGASD **E**IEKLS **T**VYWF **V**TEFGLCKE **D**EVKAY **G**AGLLSAY **G**ELLHA **I**SDK **D**RRR **F**EA **S**T **V**OPY **Q**DQY **Q**P **I**YVAES **F** **D**AK **K**FR  
*Cx. quinquefasciatus* : QFSQIEGLASLGASD **E**IEKLS **T**VYWF **V**TEFGLCKE **D**EVKAY **G**AGLLSAY **G**ELLHA **I**SDK **D**RRR **F**EA **S**T **V**OPY **Q**DQY **Q**P **I**YVAES **F** **D**AK **K**FR  
*Ae. aegypti* : QFSQIEGLASLGASD **E**IEKLS **T**VYWF **V**TEFGLCKE **D**EVKAY **G**AGLLSAY **G**ELLHA **I**SDK **D**RRR **F**EA **S**T **V**OPY **Q**DQY **Q**P **I**YVAES **F** **D**AK **K**FR  
*Dr. melanogaster* : QFSQIEGLASLGASD **E**IEKLS **T**VYWF **V**TEFGLCKE **D**EVKAY **G**AGLLSAY **G**ELLHA **I**SDK **D**RRR **F**EA **S**T **V**OPY **Q**DQY **Q**P **I**YVAES **F** **D**AK **K**FR  
*Ma. sexta* : QFSQIEGLASLGASD **E**IEKLS **T**VYWF **V**TEFGLCKE **D**EVKAY **G**AGLLSAY **G**ELLHA **I**SDK **D**RRR **F**EA **S**T **V**OPY **Q**DQY **Q**P **I**YVAES **F** **D**AK **K**FR  
*Bm. mori* : QFSQIEGLASLGASD **E**IEKLS **T**VYWF **V**TEFGLCKE **D**EVKAY **G**AGLLSAY **G**ELLHA **I**SDK **D**RRR **F**EA **S**T **V**OPY **Q**DQY **Q**P **I**YVAES **F** **D**AK **K**FR  
*Da. plexippus* : QFSQIEGLASLGASD **E**IEKLS **T**VYWF **V**TEFGLCKE **D**EVKAY **G**AGLLSAY **G**ELLHA **I**SDK **D**RRR **F**EA **S**T **V**OPY **Q**DQY **Q**P **I**YVAES **F** **D**AK **K**FR  
*Tr. castaneum* : QFSQIEGLASLGASD **E**IEKLS **T**VYWF **V**TEFGLCKE **D**EVKAY **G**AGLLSAY **G**ELLHA **I**SDK **D**RRR **F**EA **S**T **V**OPY **Q**DQY **Q**P **I**YVAES **F** **D**AK **K**FR  
 QFSQIEGLASLGASD **E**IEKLS **T**VYWF **V**TEFGLCKE 6KAYGagLLS yGELLHA6SDKpE RpFePasTa6QYQDQYQPIY5VAE3FeDaK KFR

*An. gambiae* : RVWSMSRPFVEFRNPH **T**DRVE **L**DSV **G**KL **T**LV **S**OLNTE **V**LHL **T**NA **I**KL **R** **P**FC  
*An. coluzzii* : RVWSMSRPFVEFRNPH **T**DRVE **L**DSV **G**KL **T**LV **S**OLNTE **V**LHL **T**NA **I**KL **R** **P**FC  
*An. arabiensis* : RVWSMSRPFVEFRNPH **T**DRVE **L**DSV **G**KL **T**LV **S**OLNTE **V**LHL **T**NA **I**KL **R** **P**FC  
*An. stephensi* : RVWSMSRPFVEFRNPH **T**DRVE **L**DSV **G**KL **T**LV **S**OLNTE **V**LHL **T**NA **I**KL **R** **P**FC  
*An. dirus* : RVWSMSRPFVEFRNPH **T**DRVE **L**DSV **G**KL **T**LV **S**OLNTE **V**LHL **T**NA **I**KL **R** **P**FC  
*An. funestus* : RVWSMSRPFVEFRNPH **T**DRVE **L**DSV **G**KL **T**LV **S**OLNTE **V**LHL **T**NA **I**KL **R** **P**FC  
*An. sinensis* : RVWSMSRPFVEFRNPH **T**DRVE **L**DSV **G**KL **T**LV **S**OLNTE **V**LHL **T**NA **I**KL **R** **P**FC  
*Cx. quinquefasciatus* : RVWSMSRPFVEFRNPH **T**DRVE **L**DSV **G**KL **T**LV **S**OLNTE **V**LHL **T**NA **I**KL **R** **P**FC  
*Ae. aegypti* : RVWSMSRPFVEFRNPH **T**DRVE **L**DSV **G**KL **T**LV **S**OLNTE **V**LHL **T**NA **I**KL **R** **P**FC  
*Dr. melanogaster* : RVWSMSRPFVEFRNPH **T**DRVE **L**DSV **G**KL **T**LV **S**OLNTE **V**LHL **T**NA **I**KL **R** **P**FC  
*Ma. sexta* : RVWSMSRPFVEFRNPH **T**DRVE **L**DSV **G**KL **T**LV **S**OLNTE **V**LHL **T**NA **I**KL **R** **P**FC  
*Bm. mori* : RVWSMSRPFVEFRNPH **T**DRVE **L**DSV **G**KL **T**LV **S**OLNTE **V**LHL **T**NA **I**KL **R** **P**FC  
*Da. plexippus* : RVWSMSRPFVEFRNPH **T**DRVE **L**DSV **G**KL **T**LV **S**OLNTE **V**LHL **T**NA **I**KL **R** **P**FC  
*Tr. castaneum* : RVWSMSRPFVEFRNPH **T**DRVE **L**DSV **G**KL **T**LV **S**OLNTE **V**LHL **T**NA **I**KL **R** **P**FC  
 RVWSMSRPFVEFRNPH **T**DRVE **L**DSV **G**KL **T**LV **S**OLNTE **V**LHL **T**NA **I**KL **R** **P**FC K64 p5

Figure S2

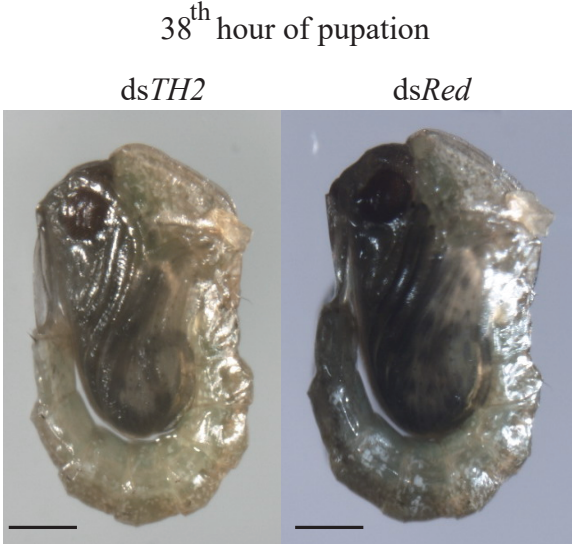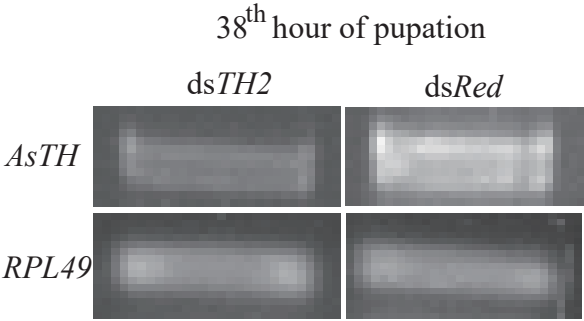

Figure S3

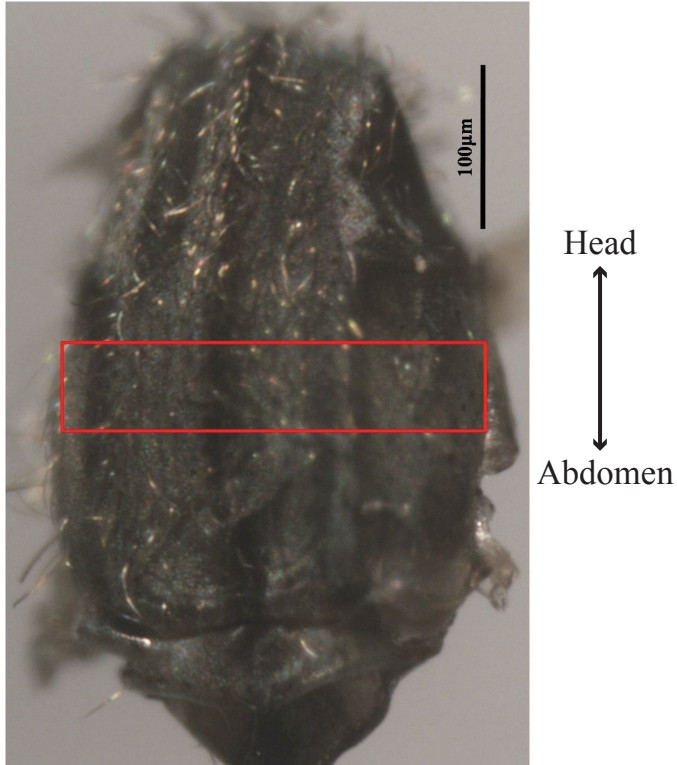

Figure S4

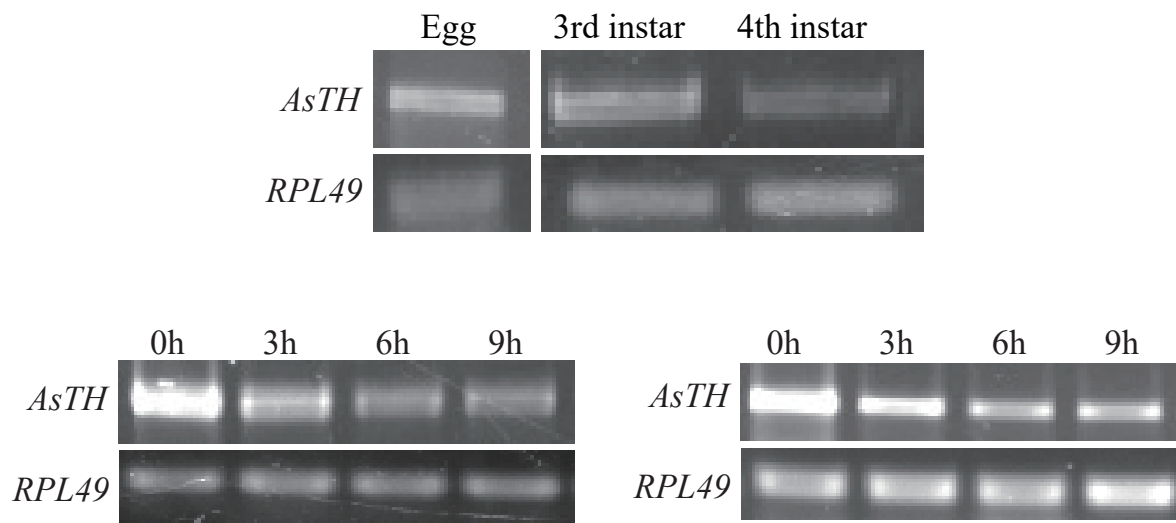

Figure S5

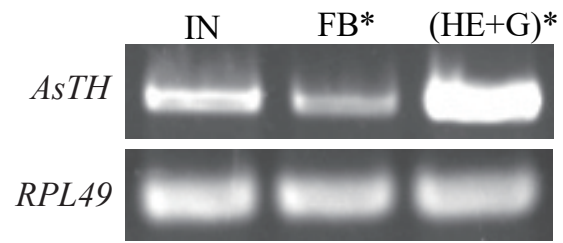

Figure S6

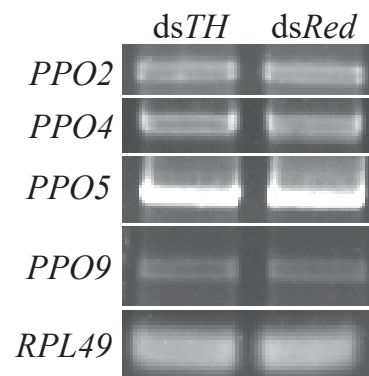



**Table S1. Primers used in this study**

| Primer name                                   | Sequence                                      |                                                |
|-----------------------------------------------|-----------------------------------------------|------------------------------------------------|
|                                               | F primer (5'---3')                            | R primer (5'---3')                             |
| Primers for <i>TH</i> cloning                 |                                               |                                                |
| <i>AsTH</i> sequence 1                        | CCGATACCTGCCAAATCCAC                          | TGAGTCTGACGAGCCCTAACTCT                        |
| <i>AsTH</i> sequence 2                        | AAGACAAACTTCCGCAAGAGGT                        | CGTGTGGTAGGGCGAGTTG                            |
| <i>AsTH</i> sequence 3                        | CGGAAAGCGGTATGCATTCATA                        | TCATCCAGGACGGTTTGTITG                          |
| <i>AsTH</i> sequence 4                        | CCAGCTCAACACCGAACTGC                          | AGGGGAAGAGGGAGGATGAAC                          |
| 3'RACE nested primer                          | CAGAGTTAGGGCTCGTCAGACTCAT                     | CGCTACGTAACGGCATGACAGTG                        |
| 3'RACE primer                                 | CTTATGAGGACGGACAGAGTTAGGG                     | GCTGTCAACGATACGCTACGTAACG                      |
| Primers used in RT-PCR                        |                                               |                                                |
| <i>AsTH</i>                                   | GCTGGCGTTCCGCATCTT                            | GCGATGGCATTGGTGAGGT                            |
| <i>RPL49</i>                                  | GGAGCCGGTCGGTGATATGT                          | TTCCTTCTCGGTCGGCTTCG                           |
| <i>AsAttacin</i>                              | CGGGTTTTTCCTGATTTGTGC                         | GCGACCGAAGTGCTGCGTAT                           |
| <i>AsCecropin-A</i>                           | ATCTTCGTATTCGTCCTGCTGG                        | GCCTTCTTGCCGCCTTGA                             |
| <i>AsCecropin-B</i>                           | GCCTGTTCGTGGTGTGATG                           | AGCAGTGCCTTCTGAGCCG                            |
| <i>AsDefensin</i>                             | ATCGTGCTGGTTGTGGTGGTA                         | GCAGGTTGCCCGCTTGAA                             |
| <i>AsGambicin</i>                             | TTCTCCTCGCCGTCCTCCT                           | CCGTATCGTTGGCAGTCCG                            |
| <i>AsPPO 2</i>                                | CTGGACGAGGAGCGTGGTAT                          | AGTCACATGGTGCGTTAGGATC                         |
| <i>AsPPO 4</i>                                | GTGCGATGGCGGTGTTTG                            | TCGTGGATGTAGCCGAGAATG                          |
| <i>AsPPO 5</i>                                | GTGCCTTCGCCGACATCA                            | CATTGTATCGCAAACGACCCT                          |
| <i>AsPPO 9</i>                                | CGGGTGTCACGCTATGGGA                           | TCTTCACGGCATCGTCTTCG                           |
| Quantitative RT-PCR primers                   |                                               |                                                |
| <i>AsDDC</i>                                  | GGACAGGGTGGTGGTGTTATTCA                       | GATTGCCTTCTCCAGCGTTTC                          |
| <i>Aslaccase2</i>                             | GTTCCCCTAACGAGCACACATT                        | CTCCAAACCGTCTTCGCATC                           |
| <i>RPS7</i>                                   | CGGAGAAGATGGCATGGGAGAT                        | ATAGTGAGCATAGGCCCGGTTA                         |
| Primers used for dsRNA template amplification |                                               |                                                |
| <i>AsTH</i> sequence 1                        | TAATACGACTCACTATAGGGAGAAAGACAAACTTCCGCAAGAGGT | TAATACGACTCACTATAGGGAGACGTGTGGTAGGGCGAGTTG     |
| <i>AsTH</i> sequence 2                        | TAATACGACTCACTATAGGGAGACCGATACTGCCAAATCCAC    | TAATACGACTCACTATAGGGAGATGAGTCTGACGAGCCCTAACTCT |
| <i>Red</i>                                    | TAATACGACTCACTATAGGGAGACTTCAAGGTGCGCATGGAG    | TAATACGACTCACTATAGGGAGATGTGGATCTCGCCCTTCAG     |



**Table S3. Statistic of RNAi (For Cuticle tanning, at 38<sup>th</sup> hour of pupation)**

| Treatment                 | Injected No. | No. of individuals<br>with tanning impaired<br>(alive) | No. of Death at 38 <sup>th</sup><br>hour of pupation |
|---------------------------|--------------|--------------------------------------------------------|------------------------------------------------------|
| <i>dsTH</i>               | 58           | 32                                                     | 6                                                    |
| <i>dsTH2</i>              | 42           | 18                                                     | 5                                                    |
| dsRed (For <i>dsTH</i> )  | 49           | 0                                                      | 5                                                    |
| dsRed (For <i>dsTH2</i> ) | 36           | 0                                                      | 4                                                    |
